# Supplementary material for: Supplementation of green coffee bean extract in healthy overweight subjects increases lean mass/fat mass ratio: A randomized, double-blind clinical study
Source: PubMed Central journal article supplement — SAGE Open Med. 2021 Mar 19;9:20503121211002590. doi: 10.1177/20503121211002590 (PMC7983441; doi:10.1177/20503121211002590), 2021-03-19
Supplement: sj-pdf-1-smo-10.1177_20503121211002590.pdf [file sj-pdf-1-smo-10.1177_20503121211002590.pdf]

## HPLC analysis of CGA-7™

### Requirements

Acetonitrile (CH<sub>3</sub>CN), Methanol (CH<sub>3</sub>OH), HPLC water, Formic acid & Trifluoro acetic acid (TFA)

Analytical parameters

|                    |                                                        |
|--------------------|--------------------------------------------------------|
| HPLC               | LC2010cHT Shimadzu                                     |
| Column             | C-18, 5 μm, 100×4.6 mm Phenomenex (Kinetex)            |
| Wavelength         | 330 nm                                                 |
| Flow rate          | 1.5 mL/min                                             |
| Injection volume   | 3 μL                                                   |
| Column temperature | 25 °C                                                  |
| Mobile phase       | 0.1 % Trifluoroacetic acid in water:CH <sub>3</sub> CN |

### Calculation:

$$\% \text{ Total chlorogenic acids} = \frac{\text{Peak area of sample} \times \text{Conc. of standard} \times \text{Purity of standard}}{\text{Peak area of the standard} \times \text{Conc. of the sample}}$$

## HPLC chromatogram of CGA-7

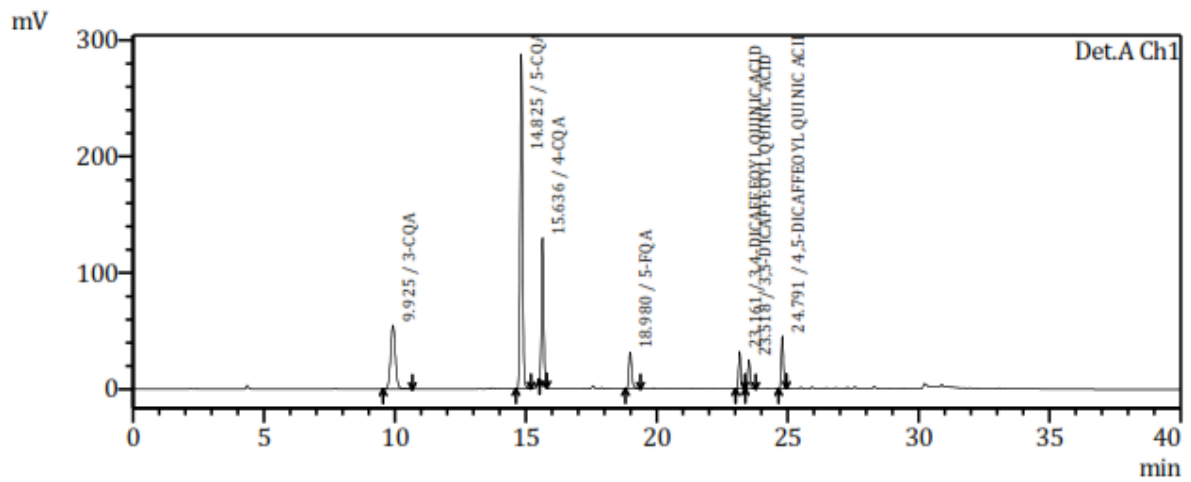

Detector A Ch1 330nm

| Peak# | Ret. Time | Name                       | Area    | Height |
|-------|-----------|----------------------------|---------|--------|
| 1     | 9.925     | 3-CQA                      | 703798  | 54897  |
| 2     | 14.825    | 5-CQA                      | 1872173 | 287487 |
| 3     | 15.636    | 4-CQA                      | 728229  | 124776 |
| 4     | 18.980    | 5-FQA                      | 245322  | 31613  |
| 5     | 23.161    | 3,4-DICAFFEOYL QUINIC ACID | 189465  | 32109  |
| 6     | 24.518    | 3,5-DICAFFEOYL QUINIC ACID | 153037  | 25011  |
| 7     | 24.791    | 4,5-DICAFFEOYL QUINIC ACID | 262144  | 45099  |
| Total |           |                            | 4154166 | 600992 |

## Normal Diet (Caloric information)

| Breakfast |          |                |
|-----------|----------|----------------|
| Food Item | Quantity | Calories (cal) |
| Idli      | 100 g    | 338            |
| Sambhar   | 200 g    |                |
| Upma      | 20 g     | 480            |

|                           |       |      |
|---------------------------|-------|------|
| Chutney                   | 200 g |      |
| Mix Veg Pulav             | 130 g | 760  |
| Bundhi Raita              | 60 g  |      |
| Chapathi                  | 4 no. |      |
| Channa masala             | 150 g |      |
| Dosa                      | 3 no. | 452  |
| Veg sagu                  | 200 g |      |
| <b>Lunch</b>              |       |      |
| Chapathi                  | 2 no. | 230  |
| Vegetable curry           | 100 g |      |
| Rice                      | 150 g |      |
| Sambhar                   | 200 g |      |
| Rice                      | 150 g | 1015 |
| Sambhar                   | 200 g |      |
| Sheera                    | 100 g |      |
| Paratha                   | 3 no. |      |
| Tindli veg                | 100 g |      |
| Chapathi                  | 2 no. | 750  |
| Tomato curry              | 100 g |      |
| Rice                      | 150 g |      |
| Dal                       | 150 g |      |
| Vegetable biryani         | 200 g | 550  |
| <b>Snacks</b>             |       |      |
| Fruit salad               | 300 g | 270  |
| Sprout masala             | 150 g | 275  |
| Samosa                    | 2 no. | 385  |
| Green chutney             | 20 g  |      |
| <b>Dinner</b>             |       |      |
| Chapathi                  | 4 no. | 950  |
| Vegetable curry           | 150 g |      |
| Jeera rice                | 150 g |      |
| Dal                       | 175 g |      |
| Chapathi                  | 4 no. | 1020 |
| Palak curry               | 150 g |      |
| Ghee rice                 | 150 g |      |
| Vegetable kurma           | 150 g |      |
| Chapathi                  | 3 no. | 830  |
| Channa masala             | 150 g |      |
| Vegetable pulav           | 120 g |      |
| Gulab Jamun               | 1 no. |      |
| Roti                      | 3 no. | 825  |
| Brinjal/ladies finger veg | 100 g |      |
| Vegetable pulav           | 150 g |      |
| Bundhi raita              | 50 g  |      |
| Chapathi                  | 3 no. | 950  |
| Cabbage veg               | 100 g |      |
| Rice                      | 150 g |      |
| Sambhar                   | 150 g |      |

### Non-vegetarian items

|                                                    |           |
|----------------------------------------------------|-----------|
| 1 bowl Chicken Dum Biryani + 1 Bowl Cucumber salad | = 400 cal |
| Egg mayonnaise sandwich: 2 pieces                  | = 265 cal |
| 1 bowl rice +chicken curry                         | = 750 cal |
| 1 mutton Biryani                                   | = 400 cal |
| Fish meal                                          | = 450 cal |
| Fish Biryani                                       | = 350 cal |

### Sweets

|                      |           |
|----------------------|-----------|
| Gulab Jamun 2 Pieces | = 350 cal |
| Jilebi - 3-4 Pieces  | = 490 cal |
| Kheer - 1 bowl       | = 250 cal |
| Laddu - 2 Pices      | = 400 cal |

Note: Normal caloric requirement – 2000-2500 cal.

### Study event schedule

|                                              | Screening | Visit 1 | Visit 2 | Visit 3 | Visit 4 | Follow-up visit |
|----------------------------------------------|-----------|---------|---------|---------|---------|-----------------|
| Informed consent process                     | X         |         |         |         |         |                 |
| Medical and surgical history                 | X         |         |         |         |         |                 |
| Prior medications history                    | X         |         |         |         |         |                 |
| Demographic data                             | X         |         |         |         |         |                 |
| Physical examination (including vital signs) | X         | X       |         |         | X       | X               |
| DEXA analysis                                |           | X       |         |         | X       |                 |
| Laboratory assessments*                      | X         | X       |         |         | X       |                 |
| Review of I/E criteria                       | X         | X       |         |         |         |                 |
| Randomization                                |           | X       |         |         |         |                 |
| Dispensing medications                       |           | X       | X       | X       |         |                 |
| AE assessment                                |           | X       | X       | X       | X       | X               |

|                                                                         |  |   |   |   |   |   |
|-------------------------------------------------------------------------|--|---|---|---|---|---|
| Review of concomitant medications                                       |  | X | X | X | X | X |
| Review of subject diary (compliance, AEs, Con meds and dietary details) |  |   | X | X | X | X |
| Dispensing of subject diary                                             |  | X | X | X | X |   |

\*Laboratory parameters: Serum lipid profile, HbA1c, Aspartate aminotransferase, Alanine aminotransferase, Alkaline phosphatase, total and direct bilirubin, total blood cell count, urine analysis.

### Sample Size:

The sample size calculation was based on difference of 2 treatments are considered to be medically relevant. Assuming a common SD of 1.5 at the end of treatment, 31 per group would be sufficient to detect a difference of 1.1 in mean difference b/w the 2 treatment with power of 80% and a 0.05. 2-sided level of significance.

### R-Program:

```
power.t.test(n=NULL, delta=1.1, sd=1.5, sig.level=0.05, power=0.80,
             type="two.sample", alternative="two.sided")
```

Two-sample t test power calculation

```
      n = 30.18116
  delta = 1.1
     sd = 1.5
sig.level = 0.05
  power = 0.8
alternative = two.sided
```

NOTE: n is number in \*each\* group

A total of  $N$  number of subjects are required at each Treatment group in the end of the study with all the data being complete for analysis, but a proportion ( $q$ ) are expected to drop out before the study ends. In this case, the following total number of subjects ( $N1$ ) would have to be enrolled to ensure that the final sample size ( $N$ ) in each Treatment group is:

$$N1 = \frac{N}{1 - q} = \frac{31}{(1 - 0.10)} = 35$$

Where  $q$  is the proportion of attrition and is generally 10% in this type of studies.

Note: The proportion of eligible subjects who will refuse to participate (drop out) or provide the inadequate information will be unknown at the beginning of the study. Approximate estimates is often possible using information from similar studies.
